# Supplementary material for: Unifying Time to Contact Estimation and Collision Avoidance across Species
Source: PubMed Central journal article supplement (PMC3420976; doi:10.1371/journal.pcbi.1002625), 2012-08-16
Supplement: pcbi.1002625.s003.pdf [file pcbi.1002625.s003.pdf]

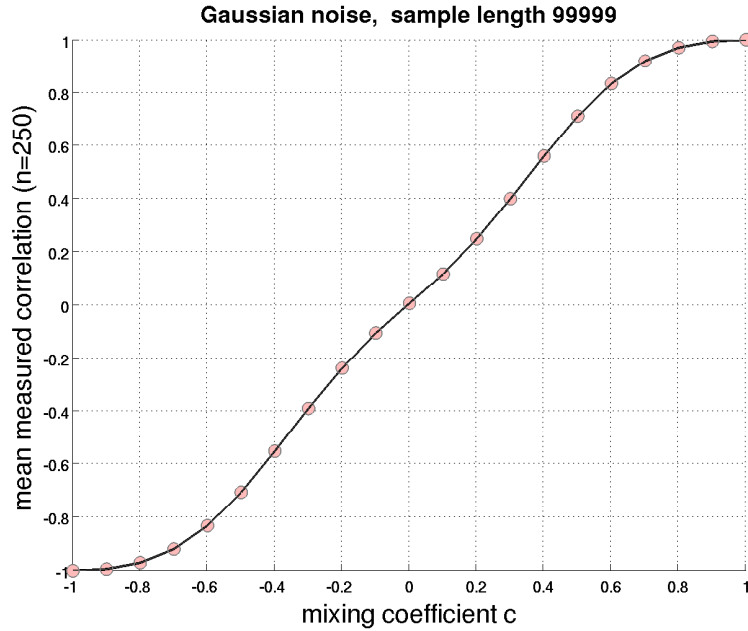

Figure S10: **Mixing coefficient  $c$  versus measured correlation.** The figure shows the relationship of the mixing coefficient  $c$  in equation (S12) with measured correlation. For this figure, the sample size of  $\xi_i$  ( $i = 0, 1, 2$ ) was 99999. Correlation was measured 250 times with different samples, and the mean value is shown. Standard deviations were in the order of  $10^{-15}$  and thus are not visible. The mixing coefficient  $c$  underestimates the measured correlations somewhat for positive values (e.g.  $c = 0.6$  yields a measured correlation of about 0.8). Overestimation occurs for  $c < 0$ .

### S3 Noise Suppression

In this section the robustness against noise of the various models will be studied. Such a numerical analysis may seem strange at first sight, because these models do not represent full image processing approaches for *ttc*-estimation (e.g. [1, 2]). We have instead two different objectives in mind: *First*, we want to know how our proposed models  $\tau_{\text{mod}}$  and  $\tau_{\text{cm}}$ , respectively, compare to  $\tau$  and  $\eta$ . We think that the new model(s) should have at least a comparable noise suppression performance as the previous one(s). *Second*, we need to know how noise affects these functions during an object approach, and how the signal-to-noise ratio depends on certain stimulus parameters. We will require these results for interpreting the simulation-results of our psychophysical experiment, as noise plays an important role in these simulations. We commence with adding Gaussian distributed noise  $\xi_i$  (both  $i = 1, 2$  mean zero and standard deviation one) with *probability*  $p = 0.0075$  to angular variables:

$$\begin{aligned}\tilde{\Theta} &\equiv (1 - p) \cdot \Theta + p\xi_1 \\ \dot{\tilde{\Theta}} &\equiv (1 - p) \cdot \dot{\Theta} + p\xi_2\end{aligned}\tag{S11}$$

In order to examine the impact of correlations between  $\xi_1$  and  $\xi_2$  on model performance, let  $\xi_0$  be a third standard normal distributed random variable (mean zero and standard deviation one), which is uncorrelated with  $\xi_1$ . We then define  $\xi_2$  as

$$\xi_2 = c\xi_1 + (1 - |c|) \cdot \xi_0\tag{S12}$$

such that the two random variables  $\xi_1$  and  $\xi_2$  have the approximate correlation  $c$ , with  $-1 \leq c(\xi_1, \xi_2) \leq 1$  (Figure S10).

Figures S12 and S14, respectively, display the relative error of several functions. Let  $f(t) \geq 0$  be any function of optical variables (representing, for example  $\tau$  or  $\tau_{\text{mod}}$ ), and  $\tilde{f}_i(t)$  the same function with noise at random trial  $i$  (equation S11). Then we define the relative error  $e_i[f(t)]$  as

$$e_i[f(t)] = \frac{|f(t) - \tilde{f}_i(t)|}{f(t) + \epsilon} \quad (\text{S13})$$

with a small constant  $\epsilon = 10^{-3}$  to prevent numerical issues. In all figures of this section, the median value  $\text{median}_{i \in \{1 \dots 999\}} e_i[f(t)]$  across 999 random trials is depicted. In Figures S13 and S15, the median value is integrated, in order to achieve a more compact graphical representation:

$$E(f) = \frac{1}{t_c} \int_0^{t_c} \text{median}_{i \in \{1 \dots 999\}} e_i[f(t)] dt \quad (\text{S14})$$

### S3.1 Modified Tau (m-Tau)

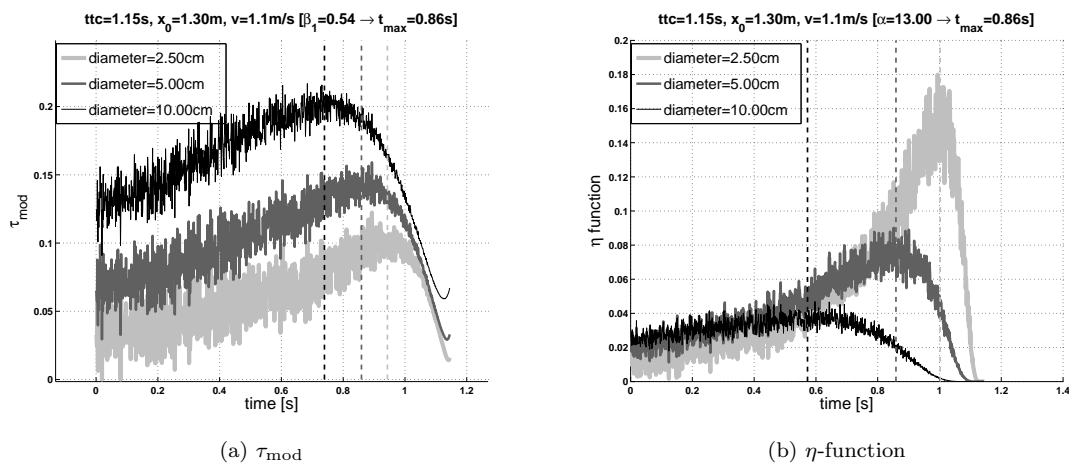

Figure S11: **m-Tau and  $\eta$ -function with uncorrelated noise** ( $c = 0$ ). Each curve shows one typical random trial, and the noise was identical for all six curves. The time when both functions had their respective maximum was chosen identically as well ( $t_{\text{max}} = 0.75t_c = 0.86$  s at default object diameter 5 cm). All theoretical maxima are indicated by broken vertical lines, which have the same luminance as the corresponding curves. **(a)** Because the values of angular variables increase nearly exponentially, whereas their associated noise level stays fixed (i.e., signal-independent, cf. equation S11), less noise fluctuations are seen with  $\tau_{\text{mod}}(t)$  as  $t_{tc}$  is approached. **(b)** Noise fluctuations also decrease with time for the  $\eta$ -function. Notice that signal amplitudes of the  $\eta$ -function increase with decreasing diameters, whereas signal amplitude is proportional to diameter for  $\tau_{\text{mod}}$ .

The  $\eta$ -function and  $\tau_{\text{mod}}$  are juxtaposed in Figure S11, where uncorrelated noise has been added to both functions. Three curves corresponding to three diameters<sup>1</sup> are shown. Amplitudes of  $\tau_{\text{mod}}$  increase with increasing diameter. The opposite is true for the  $\eta$ -function. For both functions, fluctuation magnitudes (approximate areas swept by the jitter) decrease with increasing diameter, and fluctuations decrease when approaching  $t_{tc}$ .

Figure S12 suggests that in terms of (median) relative error  $e$ ,  $\tau_{\text{mod}}$  “wins”, and  $e[\tau_{\text{mod}}(t)] \leq e[\tau(t)]$ . This simulation thus supports our claim that the modification of the original  $\tau$  function leads to an improved noise suppression performance (especially in the initial phase of the approach) – compare also Figure S11a with Figure 6a. The relative error of the  $\eta$ -function,  $e[\eta(t)]$ , tends to increase as  $t_{tc}$  is approached, and is higher than  $e[\tau_{\text{mod}}(t)]$ , particularly for bigger object diameters. For the biggest considered diameter (Figure S12c), it even exceeds  $e[\tau(t)]$ . The “peculiar” behavior of  $e[\eta(t)]$  is due to the strong decrease of  $\eta$  for  $t > t_{\text{max}}$ . It reaches small values very quickly, even before  $t_{tc}$  is actually reached. On the other hand, both  $\tau$  and  $\tau_{\text{mod}}$  have a minimum short before  $t_c$  (section S6.2), and increase afterwards until  $t_c$ . Thus, normalization by the noise-free function (denominator of equation S13) causes amplification of  $e[\eta(t)]$  as  $t_c$  is approached, while it causes suppression for  $e[\tau(t)]$  and  $e[\tau_{\text{mod}}(t)]$ , respectively.

<sup>1</sup>These results generalize readily to the  $l/v$ -ratio, assuming a constant speed.

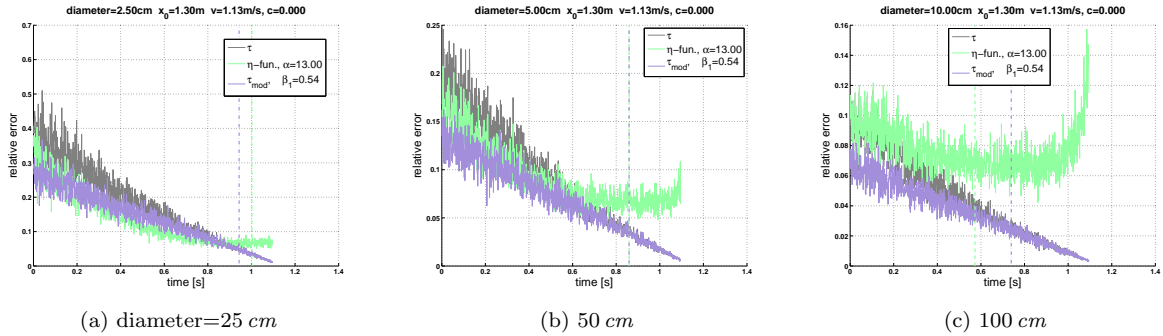

Figure S12: **Relative error for three object sizes ( $\tau_{\text{mod}}$  and  $\eta$ -function).** This figure shows the median relative error (equation S13, 999 random trials) for  $\tau_{\text{mod}}$  and the  $\eta$ -function, respectively (uncorrelated noise  $c = 0$ , identical noise was added to all curves). As in the previous figure,  $t_{\text{max}} = 0.75t_c = 0.86 \text{ s}$  at object diameter  $5 \text{ cm}$ . For comparison, the ordinary  $\tau$  function is also shown. The first observation is that the relative error of  $\tau$  and  $\tau_{\text{mod}}$ , respectively, decreases as  $t/t_c$  is approached, at which  $\tau_{\text{mod}}$  has the edge over  $\tau$ . Furthermore, relative errors of  $\tau_{\text{mod}}$  and  $\tau$  decrease with diameter. The  $\eta$ -function, however, reveals a more complicated behavior, because it decreases faster proximately before  $t/t_c$  than  $\tau$  or  $\tau_{\text{mod}}$  (both of which increase again upon approaching  $t_c$ , see section S6.2). In the initial phase of the approach, the relative error of  $\eta$  decreases with increasing diameter as well. However, close to  $t_c$ , the error does not decrease further for the smallest diameter, and even grows again for diameters  $50 \text{ cm}$  and  $100 \text{ cm}$ . The increase in relative error is due to the fact that  $\eta$  approaches zero very quickly after the maximum (faster for bigger diameters). As a consequence, the denominator of equation (S13) gets very small, what blows up the relative error.

Figure S13 illustrates how the integrated relative error  $E$  depends on object diameter and noise correlation. Both  $E(\tau_{\text{cm}})$  and  $E(\eta)$  decrease with increasing diameter. The smallest values for  $E$  are measured if identical noise is added to both angular variables  $\Theta$  and  $\dot{\Theta}$  (correlated noise,  $c = 1$ ). The biggest values of  $E$  are measured for  $c = -1$ , and intermediate values of  $E$  are obtained for  $c = 0$ . Thus, the “less” the correlation, the “bigger” the errors.

We also observed a dependence on the time  $t_{\text{max}}$  when both functions attain their maximum amplitude ( $\alpha$  and  $\beta_1$  were chosen such that  $\eta$  and  $\tau_{\text{mod}}$ , respectively, had identical  $t_{\text{max}}$ ). Changing  $t_{\text{max}}$  of  $\tau_{\text{mod}}$  translates into a moderate change in  $E(\tau_{\text{mod}})$ , and the linear dependence of  $E(\tau_{\text{mod}})$  on object diameter remains unaffected. For the  $\eta$ -function, the corresponding change in  $t_{\text{max}}$  is accompanied by a comparatively dramatic change in the nonlinear dependence of  $E(\eta)$  on object diameter. Again, this behavior is a result of that the relative error of  $\eta$  is amplified after its maximum, where  $\eta$  quickly approaches zero.

### S3.2 Corrected Modified Tau

In the main text it has been shown that the *corrected m-Tau-model* ( $\tau_{\text{cm}}$ , equation 5) is constrained by two “limit functions”, such that  $\tau(t) < \tau_{\text{cm}}(t) < \tau_{lp}(t)$ . These results also apply to the noisified version of the *corrected m-Tau-model*:

$$\tau_{\text{cm}}(t) \equiv \underbrace{\frac{\tilde{\Theta}}{\dot{\tilde{\Theta}} + \beta}}_{\tau_{\text{mod}}(t)} + \underbrace{\frac{\beta\vartheta}{\dot{\vartheta}(\dot{\vartheta} + \beta) + \epsilon}}_{\Delta\tau_{\text{corr}}} \quad (\text{S15})$$

Thus, for the noisified angular size  $\tilde{\Theta}$  and angular velocity  $\dot{\tilde{\Theta}}$ , we have  $\tau = \tilde{\Theta}/\dot{\tilde{\Theta}}$ . Likewise,  $\tau_{lp} = \vartheta/\dot{\vartheta}$ , but with  $\tilde{\Theta}$  and  $\dot{\tilde{\Theta}}$  replacing  $\Theta$  and  $\dot{\Theta}$ , respectively, in equation (4).

Figure S14 shows the relative error  $e$  for three object diameters (footnote 1). It suggests that  $e[\tau(t)] \geq e[\tau_{\text{cm}}(t)] \geq e[\tau_{lp}(t)]$ . Important,  $e[\tau_{\text{cm}}(t)]$  clings to  $e[\tau_{lp}(t)]$ , albeit all  $\beta_i = 1$  (i.e. far away from the limit case  $\beta \gg 1$ ). In other words, no particularly big values of  $\beta_i$  are necessary for achieving a high noise suppression.

Figure S15 shows  $E(\tau_{\text{cm}})$  along with the integrated relative error of the limit functions. Less noise correlations increase the  $E$  of all three functions, with  $E$  showing an approximately linear decrease with object diameter. Increasing the diameter causes an increasing separation  $|E(\tau_{\text{cm}}) - E(\tau_{lp})|$ . The separation is most prominent for  $c = 1$ , where  $E(\tau_{\text{cm}})$  matches  $E(\tau_{lp})$  at the smallest diameter, but  $E(\tau_{\text{cm}}) \approx E(\tau)$  at the biggest diameter. For the sake of clarity, the lines in Figure S15 connect the (gray) symbols of each respective function with  $c = 0$ .

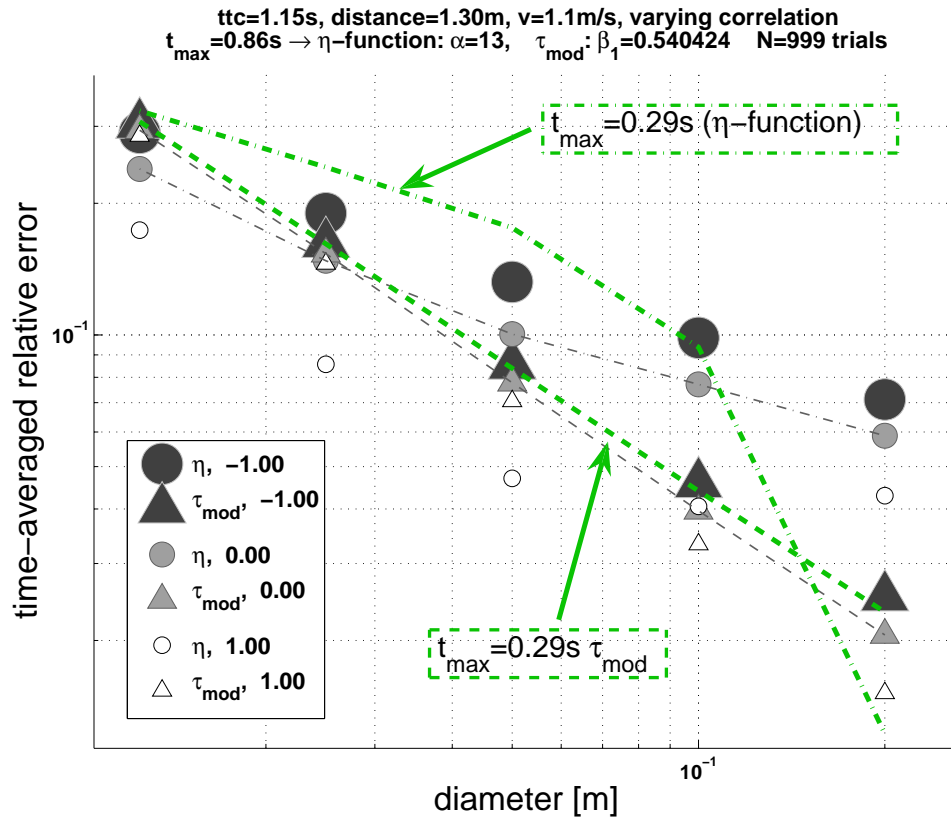

Figure S13: **Noise suppression and noise correlations ( $\tau_{\text{mod}}$  versus  $\eta$ -function).** The integrated error  $E$  (equation S14) of  $\eta$  and  $\tau_{\text{mod}}$  is shown for different diameters of approaching objects, and for different noise correlation coefficients  $c$  (equation S12). As in the two previous figures,  $t_{\max} = 0.75t_c = 0.86$  s at object diameter 5 cm. In addition, the bold green curves identified by arrows and corresponding text boxes show  $E(\tau_{\text{cm}})$  and  $E(\eta)$ , respectively, for  $t_{\max} = 0.25t_c = 0.29$  s at object diameter 5 cm for uncorrelated noise. The relative error of  $\tau_{\text{mod}}$  increases moderately for  $t_{\max} = 0.29$  s ( $\beta_1 = 0.06$ ) with respect to  $t_{\max} = 0.86$  s ( $\beta_1 = 0.54$ ), and curves remain at an approximately linear decrease with increasing object diameter. The relative error of the  $\eta$ -function increases with diameter for  $t_{\max} = 0.86$  ( $\alpha = 13$ ), but decreases if its maximum is located earlier at 0.29 s ( $\alpha = 39$ ). Adding identical noise (i.e.  $\xi_1 = \xi_2$ ) to the angular variables ( $c = 1$ , open symbols) give the smallest errors, because fluctuations in the angular variables are in the same direction and can cancel each other: In the early phase of the approach,  $E(\tau_{\text{cm}}) > E(\eta)$ , but in the late phase the opposite holds true. Negative noise correlations ( $c = -1$ , black symbols) lead to the highest values of  $E$  for both functions, because fluctuations of optical variables go in opposite directions and add to each other. A somewhat better noise suppression performance (that is, smaller values of  $E(\tau_{\text{cm}})$  and  $E(\eta)$  at all diameters) is observed for uncorrelated noise ( $c = 0$ , grey symbols).

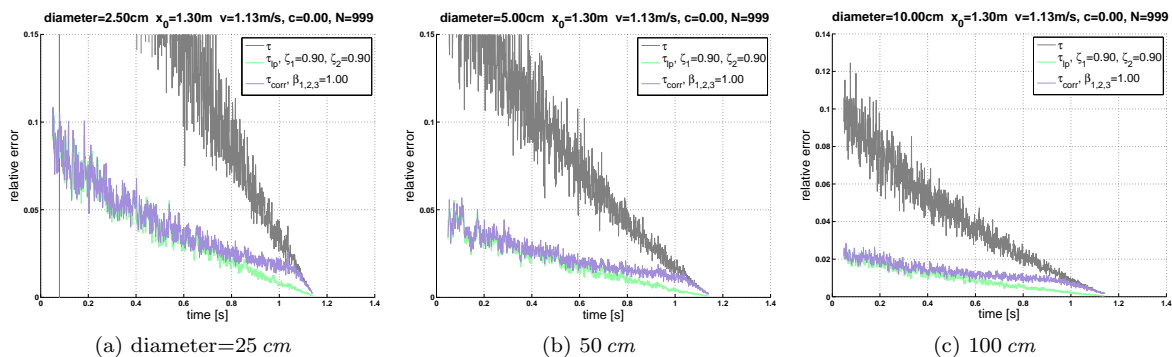

Figure S14: **Relative error for three object sizes (corrected  $m$ -Tau).** This figure shows the median relative error (equation S13, 999 random trials) for  $\tau_{\text{cm}}$  and its two limit functions  $\tau$  and  $\tau_{lp}$ , respectively (uncorrelated noise). For the comparatively small values of  $\beta_i = 1$  chosen here, the noise suppression performance of  $\tau_{\text{cm}}$  is more similar to that of  $\tau_{lp}$ , rather than  $\tau$ . This difference, however, gets smaller as  $ttc$  is approached, because the values of angular variables increase nearly exponentially while the noise level stays constant. Noise suppression performance also depends on object size: Doubling the diameter divides the relative error by two.

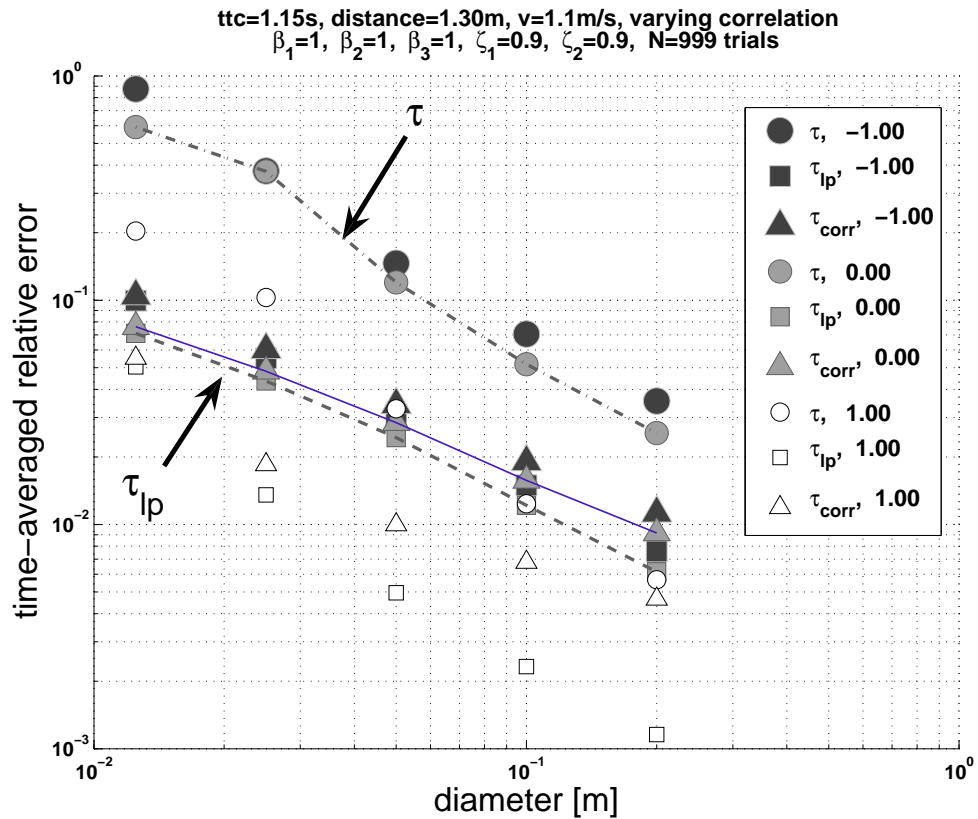

Figure S15: **Noise suppression and noise correlations (*corrected  $m$ -Tau*)**. The figure shows the integrated error (equation S14) for different diameters of approaching objects, and also for different noise correlation coefficients  $c$  (equation S12):  $E(\tau_{cm})$  (with all  $\beta_i = 1$ ) is juxtaposed with the integrated error of its two limit functions  $E(\tau)$  and  $E(\tau_{lp})$ . The broken lines that are identified by arrows represent  $E(\tau)$  and  $E(\tau_{lp})$ , respectively, for  $c = 0$ , while the continuous line denotes  $E(\tau_{cm})$  for  $c = 0$ . If identical noise is added to optical variables ( $c = 1$ , open symbols), then the smallest errors  $E$  are obtained, because fluctuations will cancel each other, as they occur in the same direction. Negative noise correlations ( $c = -1$ , black symbols) lead to the worst noise suppression performance (= highest values of  $E$ ). Uncorrelated noise ( $c = 0$ , grey symbols) causes a somewhat better suppression. Notice that for the quite “moderate” values  $\beta_i = 1$  chosen here,  $\tau_{cm}$  is only slightly worse than  $\tau_{lp}$ , which copes best with noise. The latter is true except for  $c = 1$ : For correlated noise,  $E(\tau_{cm})$  is close to  $E(\tau_{lp})$  for small object diameters, but approaches  $E(\tau)$  with increasing diameter.

## References

1. Horn B, Yajun F, Masaki I (2009) Hierarchical framework for direct gradient-based time-to-contact estimation. In: IEEE Intelligent Vehicles Symposium. IEEE, pp. 1394-1400. doi: 10.1109/IVS.2009.5164489.
2. Alenya G, Negre A, Crowley J (2009) A comparison of three methods for measure of time to contact. In: IEEE/RSJ International Conference on Intelligent Robots and Systems, 2009 (IROS 2009). IEEE/RJS, pp. 4565-4570. doi:10.1109/IROS.2009.5354024.
