# Supplementary material for: Unifying Time to Contact Estimation and Collision Avoidance across Species
Source: PubMed Central journal article supplement (PMC3420976; doi:10.1371/journal.pcbi.1002625), 2012-08-16
Supplement: pcbi.1002625.s005.pdf [file pcbi.1002625.s005.pdf]

## S5 Finding Parameter Values for *corrected m-Tau*

### S5.1 Error Measures

An “reasonable optimal” set of parameters  $\mathcal{P} = \{p_1, p_2, \zeta_1, \zeta_2, \beta_1, \beta_2, \beta_3, \beta_4\}$  was determined by systematically parsing the parameter space in several search blocks. In each successive block, the search volume was diminished, and the step size for parameters was decreased in turn. This procedure took several weeks on a standard dual core desktop computer, where  $\tau_{\text{cm}}$ -predictions for each object size (*big* & *small*) were processed in parallel. The quality of a candidate  $\mathcal{P}$  (“prediction performance”) was measured with two functions (“score measures”): root mean square error (*rmse*,  $E_{rms}$ ), and an outlier insensitive, robust error (*robe*,  $E_{rob}$ ):

$$E_{rms} = \sqrt{\frac{1}{35} \sum_{i=1}^5 \sum_{j=1}^7 (\hat{\varrho}_{ij} - \varrho_{ij})^2}$$

$$E_{rob} = \text{median}_{i \in \{1 \dots 5\}} \left( \text{median}_{j \in \{1 \dots 7\}} |\hat{\varrho}_{ij} - \varrho_{ij}| \right) \quad (\text{S18})$$

$\hat{\varrho}_{ij} \equiv \hat{\varrho}(t_{\text{pres}}[i], t_c[j])$  is the psychophysical measured proportion of later response (equation 13), and  $\varrho_{ij}$  the corresponding prediction of  $\tau_{\text{cm}}$ . For the presentation of our simulation results we plot  $\varrho$  as a function of  $t_c$  for a fixed value of  $t_{\text{pres}}$ . In order to quantify how the score measures vary between the  $t_{\text{pres}}$ , we also calculated the standard deviation (*std*,  $\sigma_{rms}$ ), and its robust estimate (via the median absolute deviation; *mad*,  $\sigma_{rob}$ ):

$$\sigma_{rms} = \sqrt{\frac{1}{4} \sum_{i=1}^5 \left( \varrho_i - \text{mean}_{j \in \{1 \dots 5\}}(\varrho_j) \right)^2}$$

$$\sigma_{rob} = 1.4826 \cdot \text{median}_{i \in \{1 \dots 5\}} |\varrho_i - \text{median}_{j \in \{1 \dots 5\}}(\varrho_j)| \quad (\text{S19})$$

Parameter search was carried out independently for object size 5 *cm* (*small*: figure S38 & Table S1) and 10 *cm* (*big*: figure S39 & Table S2). After the search, the parameter sets  $\mathcal{P}$  were ordered according to increasing score measure in score tables: The first table row corresponds to the  $\mathcal{P}$  with the best prediction performance (smallest score) and was assigned rank one. The second best  $\mathcal{P}$  has rank two, and so on. In addition to these two score tables, a third one was computed, with  $\mathcal{P}$  that are optimal for both diameters at the same time (*combined* diameters). The computation was done by just averaging the scores of *small* and *big* diameters (for corresponding values of model parameters), and then sort the result according to ascending averaged score measures (figure S40 & Table S3).

### S5.2 Simplified Models

We carried out further parameter optimizations as described in the last section with the  $\tau_{lp}$  model (equation 8;  $\mathcal{P} = \{p_1, p_2, \zeta_1, \zeta_2\}$ ), and the  $\tau_{\text{cm}}$  model with equal values of  $\beta_i \equiv \beta \forall i = 1, 2, 3$  (thus  $\mathcal{P} = \{p_1, p_2, \zeta_1, \zeta_2, \beta\}$ )

The smallest found  $E_{rms}$  scores for  $\tau_{lp}$  were: 0.10256 (*small* diameter), 0.12772 (*big*), and 0.11994 (*combined*). These values would correspond to rank 42, 47, and 39, respectively, in the corresponding tables of the fully parametrized  $\tau_{\text{cm}}$  model. The corresponding  $E_{rob}$  scores were 0.05, 0.04, and 0.06, corresponding to rank > 100, 30, and 56, respectively.

The smallest  $E_{rms}$  score for  $\tau_{\text{cm}}$  with  $\beta_1 = \beta_2 = \beta_3$  (and  $\beta_4 = 0$ ) were: 0.096454 (*small*), 0.10737 (*big*), and 0.11461 (*combined*), corresponding to ranks 19, 98, and 80, respectively. The corresponding  $E_{rob}$  values were 0.038, 0.028, and 0.05, corresponding to ranks 5, 2, and 39, respectively.

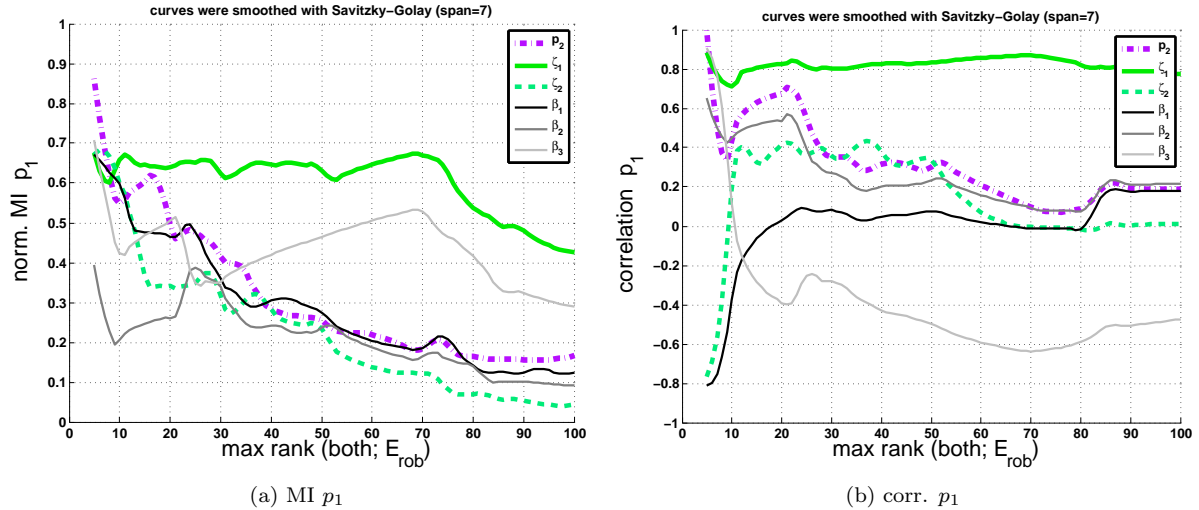

Figure S36: **Mutual information and correlation of  $p_1$  versus all other parameters.** (Ranking according to  $E_{rob}$ , combined sizes). All curves were smoothed with the Savitzky-Golay method (span 7). (a) Mutual information. (b) Correlation.

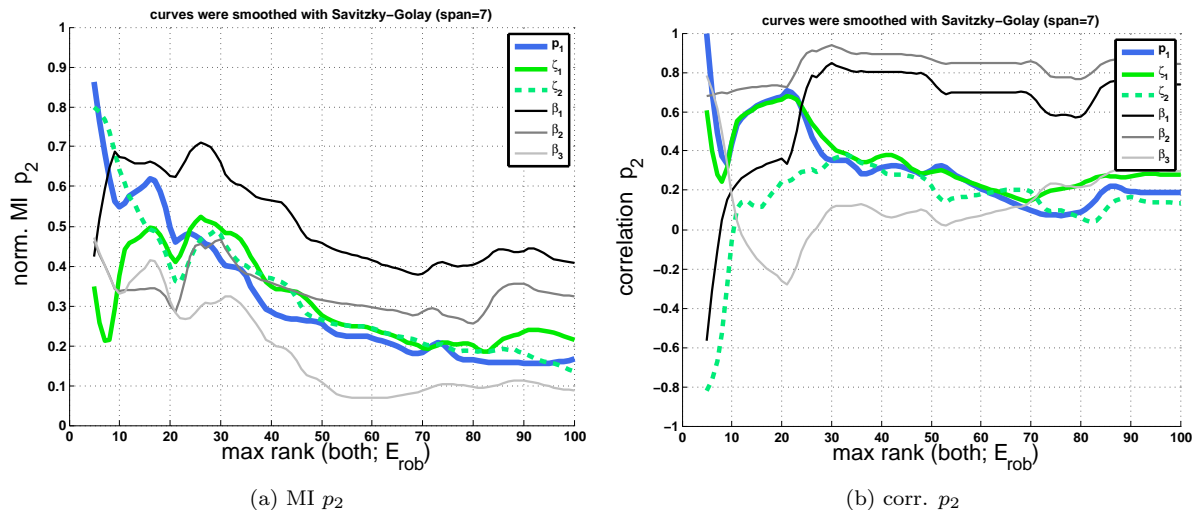

Figure S37: **Mutual information and correlation of  $p_2$  versus all other parameters.** (Ranking according to  $E_{rob}$ , combined sizes). All curves were smoothed with the Savitzky-Golay method (span 7). (a) Mutual information. (b) Correlation.

### S5.3 Relation Between Parameters

One might ask whether some parameters correlate with each other, for example, the noise level  $p_i$  with the degree of lowpass filtering  $\zeta_i$  ( $i = 1, 2$ ). We accordingly computed the correlation matrix and mutual information across  $\mathcal{P}$ . Corresponding results strongly depend on the number of included ranks (that is, the number of included parameter values). In almost all cases (i.e. combinations of size and score measures), we were not able to recognize any clear trend.

As an illustration, two exceptions are shown. Figures S36 reveal some mutual dependence of  $p_1$  on  $\zeta_1$ , both in terms of mutual information and correlation. Furthermore, figure S37 suggests, by means of correlation, some interdependence between  $p_2$  and  $\beta_1$  on the one hand, and  $p_2$  and  $\beta_2$  on the other. However, no such trend is revealed in the mutual information plot.

### S5.4 Parameter Values for *corrected m-Tau*

Concrete parameter values are given in the Tables S1 (*small*), S2 (*big*), and S3 (*combined size*). Each of the tables shows the parameter values that correspond to the best ten scores achieved, according to  $E_{rms}$  and  $E_{rob}$ . Because we parsed the parameter space, we are able to visualize how these scores depend on

| rank | $E_{rms, small}$ | $\sigma_{rms}$ | $p_1$  | $p_2$  | $\zeta_1$ | $\zeta_2$ | $\beta_1$ | $\beta_2$ | $\beta_3$ | $\beta_4$ |
|------|------------------|----------------|--------|--------|-----------|-----------|-----------|-----------|-----------|-----------|
| 1    | <b>0.082615</b>  | 0.037771       | 0.2500 | 0.1000 | 0.95      | 0.90      | 1.000     | 1.000     | 1.500     | 0.000     |
| 2    | <b>0.082780</b>  | 0.039662       | 0.2500 | 0.1000 | 0.95      | 0.90      | 1.000     | 1.000     | 1.500     | 0.001     |
| 3    | <b>0.085673</b>  | 0.032655       | 0.2500 | 0.1000 | 0.90      | 0.90      | 1.000     | 1.000     | 1.500     | 0.000     |
| 4    | <b>0.086420</b>  | 0.033155       | 0.2500 | 0.1000 | 0.90      | 0.90      | 1.000     | 1.000     | 1.500     | 0.001     |
| 5    | <b>0.088668</b>  | 0.048796       | 0.2500 | 0.1000 | 0.95      | 0.90      | 1.000     | 1.000     | 1.500     | 0.010     |
| 6    | <b>0.089901</b>  | 0.042124       | 0.2500 | 0.1000 | 0.90      | 0.90      | 1.000     | 1.000     | 1.500     | 0.010     |
| 7    | <b>0.090810</b>  | 0.029306       | 0.2500 | 0.1000 | 0.95      | 0.50      | 0.500     | 0.500     | 1.000     | 0.010     |
| 8    | <b>0.090833</b>  | 0.044017       | 0.2500 | 0.1000 | 0.90      | 0.95      | 1.000     | 1.000     | 1.500     | 0.001     |
| 9    | <b>0.091337</b>  | 0.049700       | 0.2500 | 0.1000 | 0.95      | 0.95      | 1.000     | 1.000     | 1.500     | 0.000     |
| 10   | <b>0.091387</b>  | 0.043601       | 0.2500 | 0.1000 | 0.90      | 0.95      | 1.000     | 1.000     | 1.500     | 0.000     |

  

| rank | $E_{rob, small}$ | $\sigma_{rob}$ | $p_1$  | $p_2$  | $\zeta_1$ | $\zeta_2$ | $\beta_1$ | $\beta_2$ | $\beta_3$ | $\beta_4$ |
|------|------------------|----------------|--------|--------|-----------|-----------|-----------|-----------|-----------|-----------|
| 1    | <b>0.036000</b>  | 0.005930       | 0.2500 | 0.1000 | 0.90      | 0.90      | 1.000     | 1.000     | 1.500     | 0.010     |
| 2    | <b>0.036000</b>  | 0.023722       | 0.2500 | 0.0500 | 0.90      | 0.99      | 1.000     | 0.500     | 1.000     | 0.000     |
| 3    | <b>0.036000</b>  | 0.023722       | 0.2500 | 0.0500 | 0.90      | 0.99      | 1.000     | 0.500     | 1.000     | 0.001     |
| 4    | <b>0.036000</b>  | 0.026687       | 0.2500 | 0.0500 | 0.90      | 0.99      | 1.000     | 0.500     | 1.000     | 0.010     |
| 5    | <b>0.038000</b>  | 0.005930       | 0.2500 | 0.0100 | 0.90      | 0.50      | 0.500     | 1.000     | 1.500     | 0.000     |
| 6    | <b>0.038000</b>  | 0.005930       | 0.2500 | 0.0100 | 0.90      | 0.25      | 0.500     | 1.000     | 1.500     | 0.001     |
| 7    | <b>0.038000</b>  | 0.002965       | 0.2500 | 0.0100 | 0.90      | 0.50      | 0.500     | 1.000     | 1.500     | 0.001     |
| 8    | <b>0.038000</b>  | 0.005930       | 0.2500 | 0.0075 | 0.90      | 0.50      | 0.500     | 1.000     | 1.500     | 0.001     |
| 9    | <b>0.038000</b>  | 0.029652       | 0.2500 | 0.1000 | 0.95      | 0.50      | 0.500     | 0.500     | 1.000     | 0.010     |
| 10   | <b>0.038000</b>  | 0.005930       | 0.2500 | 0.0750 | 0.90      | 0.99      | 5.000     | 1.000     | 1.500     | 0.010     |

Table S1: The ten best performing parameter sets for the *small* diameter (5 cm). The upper table shows parameter sets that are ordered according to increasing  $E_{rms}$  score (Figure S38a), and the lower table according to  $E_{rob}$  scores (Figure S38b). Corresponding  $\tau_{cm}$ -predictions for  $\varrho$  with the first five parameter sets are shown in Figures S48 & S49 ( $E_{rms}$  score), and Figures S52 & S53 ( $E_{rob}$  score).

rank numbers. Corresponding plots are shown in figure S38, S39, and S40.

### S5.5 Trial & Error Parameter Adjustment

By means of achieving the subjective best overall match between the psychometric curves  $\hat{\varrho}_i$  and corresponding model predictions  $\varrho_i$  at each presentation time  $i$  (“Chi by eye”, [1]), we arrived at the parameter set  $\mathcal{P} = \{p_1, p_2, \zeta_1, \zeta_2, \beta_1, \beta_2, \beta_3, \beta_4\} = \{0.035, 0.035, 0.9, 0.9, 2.5, 1, 0.8, 0\}$ .

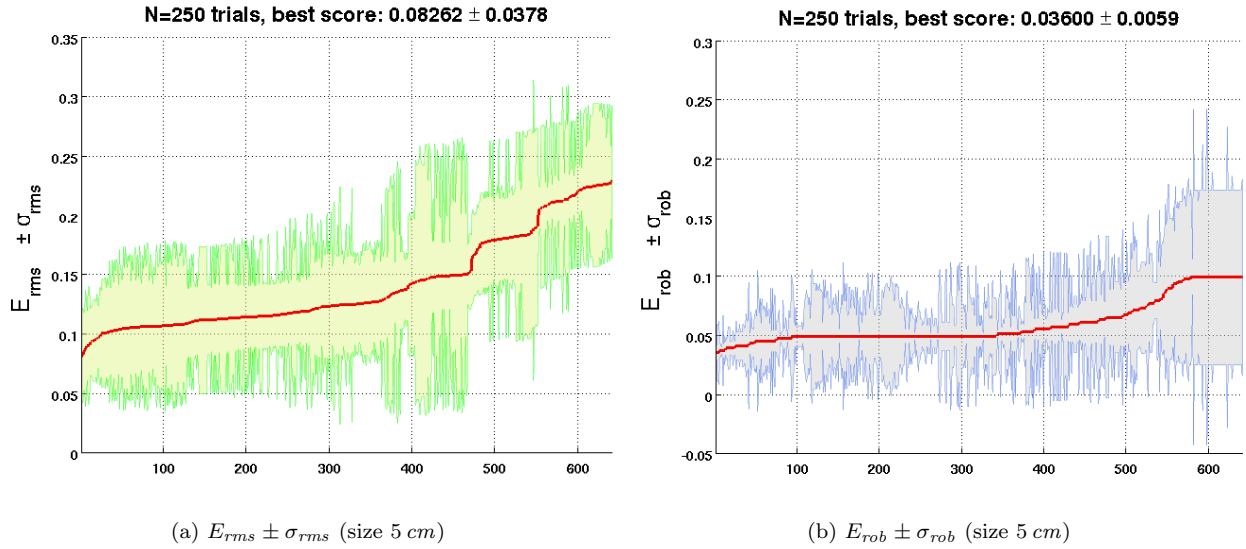

Figure S38:  $\tau_{cm}$ -scores for diameter 5 cm (*small*). Abscissa values show the rank of parameter sets in Table S1. The red lines indicate  $E_{rms}$  score and  $E_{rob}$  score. The colored areas denote variation  $\sigma_{rms}$  and  $\sigma_{rob}$ , respectively, and capture the variability across presentation times. A characteristic feature of these plots is the step-wise increment of scores (see also figures S39 & S40). They indicate abrupt changes in the curve shape of  $\tau_{cm}$ -predictions for  $\varrho$ .

| rank | $E_{rms, big}$  | $\sigma_{rms}$ | $p_1$  | $p_2$  | $\zeta_1$ | $\zeta_2$ | $\beta_1$ | $\beta_2$ | $\beta_3$ | $\beta_4$ |
|------|-----------------|----------------|--------|--------|-----------|-----------|-----------|-----------|-----------|-----------|
| 1    | <b>0.098490</b> | 0.026236       | 0.0750 | 0.0750 | 0.25      | 0.90      | 10.000    | 2.000     | 1.500     | 0.000     |
| 2    | <b>0.098708</b> | 0.033911       | 0.0750 | 0.1000 | 0.90      | 0.90      | 10.000    | 2.000     | 1.500     | 0.000     |
| 3    | <b>0.098949</b> | 0.025984       | 0.0750 | 0.0750 | 0.25      | 0.90      | 10.000    | 2.000     | 1.500     | 0.001     |
| 4    | <b>0.099057</b> | 0.033675       | 0.0750 | 0.1000 | 0.90      | 0.90      | 10.000    | 2.000     | 1.500     | 0.001     |
| 5    | <b>0.100974</b> | 0.100943       | 0.1000 | 0.0250 | 0.99      | 0.95      | 0.100     | 1.000     | 1.500     | 0.010     |
| 6    | <b>0.101449</b> | 0.025393       | 0.0750 | 0.0750 | 0.50      | 0.90      | 10.000    | 2.000     | 1.500     | 0.000     |
| 7    | <b>0.101648</b> | 0.025423       | 0.0750 | 0.0750 | 0.50      | 0.90      | 10.000    | 2.000     | 1.500     | 0.001     |
| 8    | <b>0.101872</b> | 0.097396       | 0.1000 | 0.0100 | 0.99      | 0.99      | 0.050     | 0.500     | 1.000     | 0.001     |
| 9    | <b>0.101994</b> | 0.096591       | 0.1000 | 0.0100 | 0.99      | 0.99      | 0.050     | 0.500     | 1.000     | 0.000     |
| 10   | <b>0.102404</b> | 0.097929       | 0.1000 | 0.0050 | 0.95      | 0.95      | 0.100     | 1.000     | 1.500     | 0.000     |

  

| rank | $E_{rob, big}$  | $\sigma_{rob}$ | $p_1$  | $p_2$  | $\zeta_1$ | $\zeta_2$ | $\beta_1$ | $\beta_2$ | $\beta_3$ | $\beta_4$ |
|------|-----------------|----------------|--------|--------|-----------|-----------|-----------|-----------|-----------|-----------|
| 1    | <b>0.024000</b> | 0.000000       | 0.0500 | 0.0250 | 0.90      | 0.50      | 0.050     | 0.500     | 1.000     | 0.010     |
| 2    | <b>0.028000</b> | 0.026687       | 0.2500 | 0.1000 | 0.99      | 0.95      | 0.500     | 0.500     | 0.500     | 0.000     |
| 3    | <b>0.028000</b> | 0.011861       | 0.0750 | 0.0250 | 0.99      | 0.99      | 0.050     | 0.500     | 1.000     | 0.000     |
| 4    | <b>0.028000</b> | 0.011861       | 0.0750 | 0.0250 | 0.99      | 0.99      | 0.050     | 0.500     | 1.000     | 0.001     |
| 5    | <b>0.028000</b> | 0.005930       | 0.0500 | 0.0250 | 0.90      | 0.95      | 0.050     | 0.500     | 1.000     | 0.000     |
| 6    | <b>0.028000</b> | 0.011861       | 0.0500 | 0.0250 | 0.95      | 0.50      | 0.050     | 0.500     | 1.000     | 0.010     |
| 7    | <b>0.032000</b> | 0.017791       | 0.0100 | 0.0500 | 0.25      | 0.25      | 0.050     | 0.500     | 1.500     | 0.000     |
| 8    | <b>0.032000</b> | 0.023722       | 0.0100 | 0.0500 | 0.50      | 0.25      | 0.050     | 0.500     | 1.500     | 0.001     |
| 9    | <b>0.032000</b> | 0.032617       | 0.2500 | 0.1000 | 0.99      | 0.95      | 0.500     | 0.500     | 0.500     | 0.001     |
| 10   | <b>0.032000</b> | 0.005930       | 0.0500 | 0.0250 | 0.90      | 0.90      | 0.050     | 0.500     | 1.000     | 0.000     |

Table S2: The ten best performing parameter sets for the *big* diameter (10 cm). The upper table shows parameter sets that are ordered according to increasing  $E_{rms}$  score (Figure S39a), and the lower table according to  $E_{rob}$  scores (Figure S39b). Corresponding  $\tau_{cm}$ -predictions for  $\varrho$  with the first five parameter sets are shown in Figures S50 & S51 ( $E_{rms}$  score), and Figures S54 & S55 ( $E_{rob}$  score).

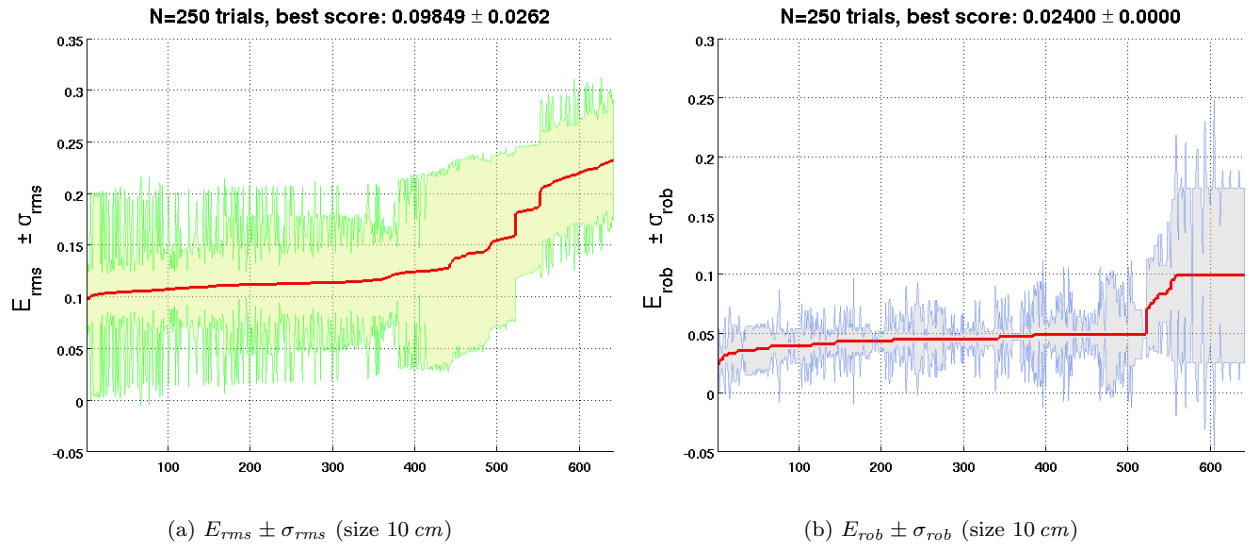

Figure S39:  $\tau_{cm}$ -scores for object diameter 10 cm (*big*). Abscissa values correspond to ranks. See legend of figure S38 for more details. The ten best performing parameter sets for *big* are listed in Table S2.

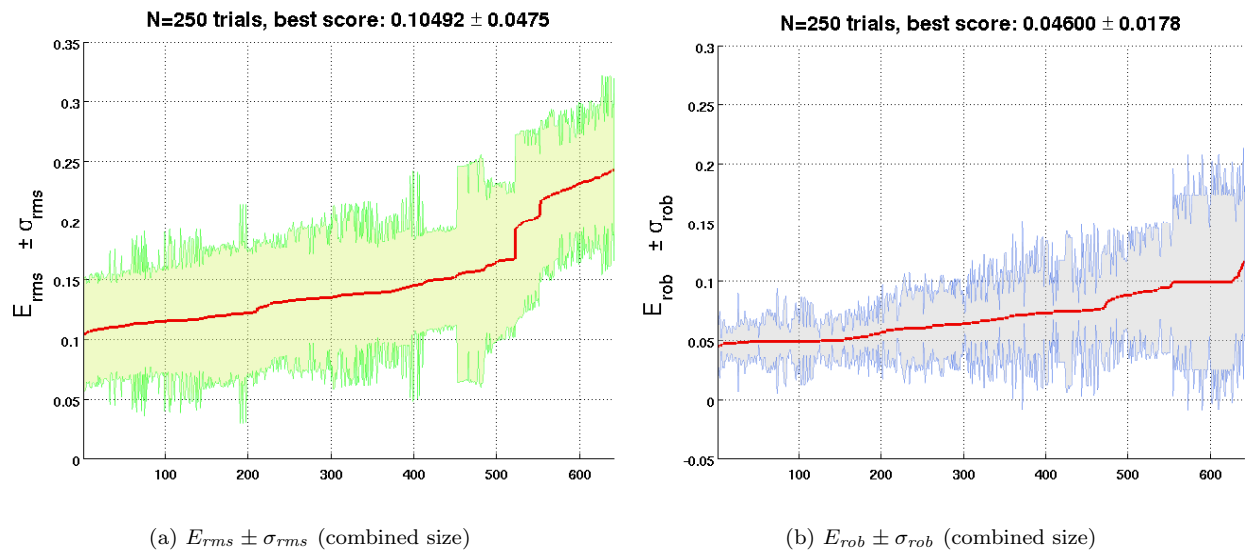

Figure S40:  $\tau_{cm}$ -scores for *combined* diameters. Abscissa values correspond to ranks. See legend of figure S38 for more details. The ten best performing parameter sets for *combined* are listed in Table S3.

| rank | $E_{rms, both}$ | $\sigma_{rms}$ | $p_1$  | $p_2$  | $\zeta_1$ | $\zeta_2$ | $\beta_1$ | $\beta_2$ | $\beta_3$ | $\beta_4$ |
|------|-----------------|----------------|--------|--------|-----------|-----------|-----------|-----------|-----------|-----------|
| 1    | <b>0.104921</b> | 0.047498       | 0.0750 | 0.0500 | 0.25      | 0.90      | 10.000    | 2.000     | 1.500     | 0.001     |
| 2    | <b>0.105220</b> | 0.047556       | 0.0750 | 0.0500 | 0.25      | 0.90      | 10.000    | 2.000     | 1.500     | 0.000     |
| 3    | <b>0.105833</b> | 0.047443       | 0.0750 | 0.0500 | 0.25      | 0.90      | 10.000    | 2.000     | 1.500     | 0.010     |
| 4    | <b>0.106300</b> | 0.041070       | 0.1000 | 0.0750 | 0.25      | 0.90      | 10.000    | 2.000     | 1.500     | 0.000     |
| 5    | <b>0.106602</b> | 0.042539       | 0.1000 | 0.0750 | 0.50      | 0.90      | 10.000    | 2.000     | 1.500     | 0.001     |
| 6    | <b>0.106821</b> | 0.042860       | 0.1000 | 0.0750 | 0.50      | 0.90      | 10.000    | 2.000     | 1.500     | 0.000     |
| 7    | <b>0.106864</b> | 0.041072       | 0.1000 | 0.0750 | 0.25      | 0.90      | 10.000    | 2.000     | 1.500     | 0.001     |
| 8    | <b>0.107734</b> | 0.047433       | 0.0750 | 0.0500 | 0.50      | 0.90      | 10.000    | 2.000     | 1.500     | 0.001     |
| 9    | <b>0.107905</b> | 0.046581       | 0.0750 | 0.0500 | 0.25      | 0.90      | 5.000     | 2.000     | 1.500     | 0.000     |
| 10   | <b>0.107938</b> | 0.047955       | 0.0750 | 0.0500 | 0.50      | 0.90      | 10.000    | 2.000     | 1.500     | 0.000     |

  

| rank | $E_{rob, both}$ | $\sigma_{rob}$ | $p_1$  | $p_2$  | $\zeta_1$ | $\zeta_2$ | $\beta_1$ | $\beta_2$ | $\beta_3$ | $\beta_4$ |
|------|-----------------|----------------|--------|--------|-----------|-----------|-----------|-----------|-----------|-----------|
| 1    | <b>0.046000</b> | 0.017791       | 0.0750 | 0.0250 | 0.99      | 0.99      | 0.050     | 0.500     | 1.000     | 0.000     |
| 2    | <b>0.046000</b> | 0.025204       | 0.1000 | 0.0500 | 0.99      | 0.90      | 0.050     | 0.500     | 1.000     | 0.000     |
| 3    | <b>0.047000</b> | 0.028169       | 0.0500 | 0.0250 | 0.95      | 0.99      | 0.500     | 0.500     | 0.500     | 0.000     |
| 4    | <b>0.047000</b> | 0.005930       | 0.1000 | 0.0500 | 0.99      | 0.50      | 0.100     | 1.000     | 1.500     | 0.000     |
| 5    | <b>0.047000</b> | 0.005930       | 0.1000 | 0.0500 | 0.99      | 0.50      | 0.100     | 1.000     | 1.500     | 0.001     |
| 6    | <b>0.047000</b> | 0.019274       | 0.0750 | 0.0250 | 0.99      | 0.99      | 0.050     | 0.500     | 1.000     | 0.001     |
| 7    | <b>0.048000</b> | 0.019274       | 0.1000 | 0.0100 | 0.99      | 0.90      | 0.010     | 0.500     | 1.000     | 0.001     |
| 8    | <b>0.048000</b> | 0.020756       | 0.1000 | 0.0075 | 0.99      | 0.90      | 0.010     | 0.500     | 1.000     | 0.001     |
| 9    | <b>0.048000</b> | 0.014826       | 0.0500 | 0.0100 | 0.50      | 0.25      | 0.005     | 0.500     | 1.500     | 0.000     |
| 10   | <b>0.048000</b> | 0.014826       | 0.0500 | 0.0100 | 0.50      | 0.50      | 0.005     | 0.500     | 1.500     | 0.000     |

Table S3: The ten best performing parameter sets for the *combined* diameter (i.e. parameter sets for simultaneously achieving an optimal prediction performance for the object diameters *big* and *small*). The upper table shows parameter sets that are ordered according to increasing  $E_{rms}$  score (Figure S40a), and the lower table according to  $E_{rob}$  scores (Figure S40b). Corresponding  $\tau_{cm}$ -predictions with the first three parameter sets are shown in Figure 8 ( $E_{rms}$  score), and Figures S56 and S57 ( $E_{rob}$  score). Notice that the first three  $E_{rms}$  scores are only distinguished by  $\beta_4$ .

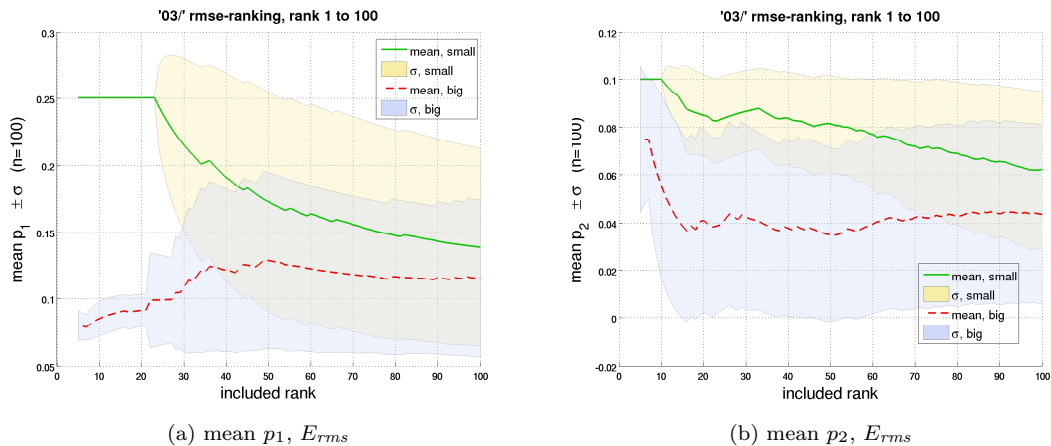

Figure S41: **Mean value of noise probabilities as a function of  $E_{rms}$  rank.** This figure shows the mean value of the noise probability equation (9) of: (a) angular size  $p_1$ , and (b) angular velocity  $p_2$ , as a function of their  $E_{rms}$  rank (see Figure 9 for more details). Abscissa values of 10, 50, etc. mean that the mean value of the first 10, first 50, etc. values of  $p_1$  and  $p_2$ , respectively, was computed. Shaded areas indicate  $\pm 1$  standard deviation. Continuous curves denote values optimized for *small* object diameter (Table S1 in Text S5), and broken curves denote corresponding values for the *big* diameter (Table S2 in Text S5).

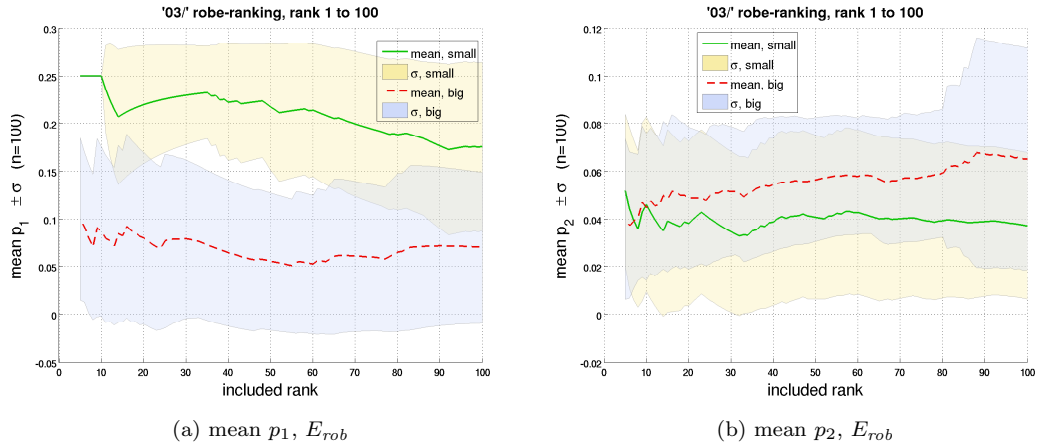

Figure S42: **Mean value of noise probabilities as a function of  $E_{rob}$  rank.** Same as the previous figure, but here the parameters  $p_1$  and  $p_2$ , respectively, were averaged according to their  $E_{rob}$  rank. Shaded areas indicate  $\pm 1$  standard deviation.

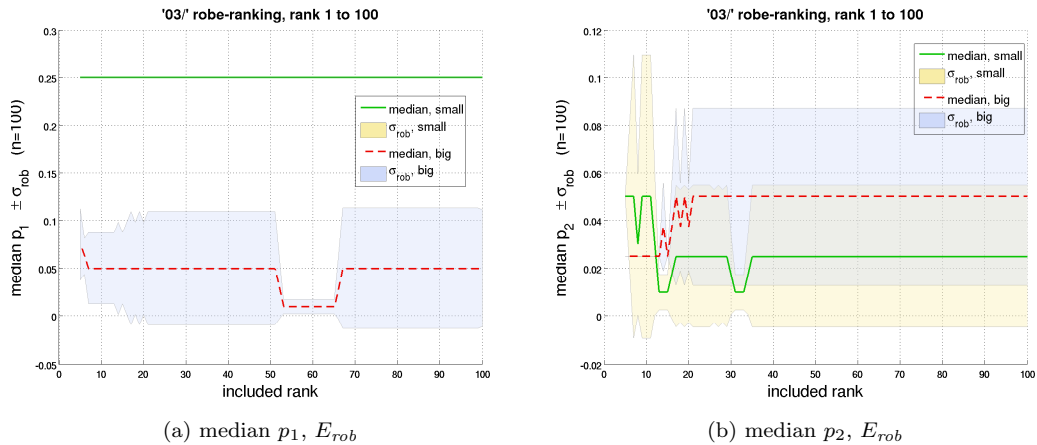

Figure S43: **Median value of noise probabilities as a function of  $E_{rob}$  rank.** Same as Figure S41, but here the median value of the parameters  $p_1$  and  $p_2$ , respectively, was computed according to their  $E_{rob}$  rank. The shaded areas denote  $\pm 1\sigma_{rob}$  (robust estimation of standard deviation via the median absolute deviation).

## References

1. Press H, Teukolsky S, Vetterling W, Flannery B (2007) Numerical Recipes: The Art of Scientific Computing, Third Edition. Cambridge University Press.
